# Supplementary material for: Highly divergent ancient gene families in metagenomic samples are compatible with additional divisions of life
Source: PubMed Central journal article supplement (PMC4624368; doi:10.1186/s13062-015-0092-3), 2015-10-26

## **Supplementary Material**

**Supplementary Table 1 : Environmental dataset.** A total of 236 environmental microbial samples was used in this study. For each sample, environmental origin, number of predicted Open Reading Frames (total and longer than 50 amino acids) and data source are given.

**Supplementary Figure 1: Distribution of Average Nucleotide Identity of highly divergent environmental sequences.** A total of 569 cliques (totally connected subnetworks) of highly divergent environmental sequences (whose identity to CPR is lower than 60%) was identified. Sequences from each of these cliques were aligned, then their average nucleotide identity were computed, and shown in abscissa. Proportion of corresponding cliques is given in ordinate.

| Filename                             | Environment                         | #ORFs   | #ORFS>50 | Source                                                                                                                  |
|--------------------------------------|-------------------------------------|---------|----------|-------------------------------------------------------------------------------------------------------------------------|
| AntarcticaAquatic_1.fasta            | Antarctica Aquatic                  | 116490  | 104903   | MG RAST ID 4443683.3                                                                                                    |
| AntarcticaAquatic_2.fasta            | Antarctica Aquatic                  | 10535   | 9632     | MG RAST ID 4443680.3                                                                                                    |
| AntarcticaAquatic_3.fasta            | Antarctica Aquatic                  | 9547    | 8875     | MG RAST ID 4443679.3                                                                                                    |
| AntarcticaAquatic_4.fasta            | Antarctica Aquatic                  | 44171   | 41965    | MG RAST ID 4443681.3                                                                                                    |
| AntarcticaAquatic_5.fasta            | Antarctica Aquatic                  | 282939  | 266909   | MG RAST ID 4443682.3                                                                                                    |
| AntarcticaAquatic_6.fasta            | Antarctica Aquatic                  | 280580  | 264549   | MG RAST ID 4443684.3                                                                                                    |
| AntarcticaAquatic_7.fasta            | Antarctica Aquatic                  | 28039   | 26396    | MG RAST ID 4443685.3                                                                                                    |
| AntarcticaAquatic_8.fasta            | Antarctica Aquatic                  | 94828   | 89432    | MG RAST ID 4443686.3                                                                                                    |
| AntarcticaAquatic_9.fasta            | Antarctica Aquatic                  | 92761   | 87149    | MG RAST ID 4443687.3                                                                                                    |
| Site227_0_1um.fasta                  | Antarctica Aquatic                  | 107770  | 84195    | <a href="https://portal.camera.calit2.net/gridsphere/">https://portal.camera.calit2.net/gridsphere/</a>                 |
| Site227_0_8um.fasta                  | Antarctica Aquatic                  | 98499   | 80718    | <a href="https://portal.camera.calit2.net/gridsphere/">https://portal.camera.calit2.net/gridsphere/</a>                 |
| Site227_3_0um.fasta                  | Antarctica Aquatic                  | 41785   | 33819    | <a href="https://portal.camera.calit2.net/gridsphere/">https://portal.camera.calit2.net/gridsphere/</a>                 |
| Site228_0_1um.fasta                  | Antarctica Aquatic                  | 90982   | 68808    | <a href="https://portal.camera.calit2.net/gridsphere/">https://portal.camera.calit2.net/gridsphere/</a>                 |
| Site228_0_8um.fasta                  | Antarctica Aquatic                  | 86160   | 69758    | <a href="https://portal.camera.calit2.net/gridsphere/">https://portal.camera.calit2.net/gridsphere/</a>                 |
| Site228_3_0um.fasta                  | Antarctica Aquatic                  | 44139   | 36294    | <a href="https://portal.camera.calit2.net/gridsphere/">https://portal.camera.calit2.net/gridsphere/</a>                 |
| Site229_0_1um.fasta                  | Antarctica Aquatic                  | 92987   | 71783    | <a href="https://portal.camera.calit2.net/gridsphere/">https://portal.camera.calit2.net/gridsphere/</a>                 |
| Site229_0_8um.fasta                  | Antarctica Aquatic                  | 59663   | 47312    | <a href="https://portal.camera.calit2.net/gridsphere/">https://portal.camera.calit2.net/gridsphere/</a>                 |
| Site229_3_0um.fasta                  | Antarctica Aquatic                  | 43132   | 35288    | <a href="https://portal.camera.calit2.net/gridsphere/">https://portal.camera.calit2.net/gridsphere/</a>                 |
| Site230_0_1um.fasta                  | Antarctica Aquatic                  | 72760   | 60393    | <a href="https://portal.camera.calit2.net/gridsphere/">https://portal.camera.calit2.net/gridsphere/</a>                 |
| Site230_0_8um.fasta                  | Antarctica Aquatic                  | 83496   | 67983    | <a href="https://portal.camera.calit2.net/gridsphere/">https://portal.camera.calit2.net/gridsphere/</a>                 |
| BBAY01.fasta                         | Botany Bay                          | 89204   | 84671    | MG RAST ID 4443688.3                                                                                                    |
| BBAY02.fasta                         | Botany Bay                          | 11537   | 10624    | MG RAST ID 4443689.3                                                                                                    |
| BBAY04.fasta                         | Botany Bay                          | 7605    | 6610     | MG RAST ID 4443691.3                                                                                                    |
| BBAY14.fasta                         | Botany Bay                          | 1331    | 897      | MG RAST ID 4443688.6                                                                                                    |
| BBAY15.fasta                         | Botany Bay                          | 116594  | 110056   | MG RAST ID 4443693.3                                                                                                    |
| ChickenCecumA.fasta                  | Chicken Cecum A                     | 6       | 1        | MG RAST ID 4440283.3                                                                                                    |
| ChickenCecumB.fasta                  | Chicken Cecum B                     | 7       | 0        | MG RAST ID 4440284.3                                                                                                    |
| GlacierIceMetagenome_SRX000607.fasta | Glacier                             | 17290   | 12163    | <a href="http://www.ncbi.nlm.nih.gov/pubmed/?term=19801459">http://www.ncbi.nlm.nih.gov/pubmed/?term=19801459</a>       |
| 4440055.3.fasta                      | Healthy gut bacteria                | 0       | 1        | <a href="http://www.theseed.org/DinsdaleSupplementalMaterial/">http://www.theseed.org/DinsdaleSupplementalMaterial/</a> |
| 4440411.3.fasta                      | Healthy Prebead tank microbes       | 1       | 0        | <a href="http://www.theseed.org/DinsdaleSupplementalMaterial/">http://www.theseed.org/DinsdaleSupplementalMaterial/</a> |
| 4440059.3.fasta                      | Healthy slime bacteria              | 0       | 0        | <a href="http://www.theseed.org/DinsdaleSupplementalMaterial/">http://www.theseed.org/DinsdaleSupplementalMaterial/</a> |
| 4440413.3.fasta                      | Healthy Tilapia pond microbes       | 1       | 0        | <a href="http://www.theseed.org/DinsdaleSupplementalMaterial/">http://www.theseed.org/DinsdaleSupplementalMaterial/</a> |
| 4440419.3.fasta                      | High saltern microbial (HB1128)     | 0       | 0        | <a href="http://www.theseed.org/DinsdaleSupplementalMaterial/">http://www.theseed.org/DinsdaleSupplementalMaterial/</a> |
| 4440061.3.fasta                      | Highborne Cay stromatolite bacteria | 16      | 0        | <a href="http://www.theseed.org/DinsdaleSupplementalMaterial/">http://www.theseed.org/DinsdaleSupplementalMaterial/</a> |
| BATS216_20m_SG.fasta                 | Hot Aloha                           | 108483  | 101423   | <a href="http://www.ncbi.nlm.nih.gov/sites/entrez/16439655">http://www.ncbi.nlm.nih.gov/sites/entrez/16439655</a>       |
| BATS216_50m_SG.fasta                 | Hot Aloha                           | 105004  | 97772    | <a href="http://www.ncbi.nlm.nih.gov/sites/entrez/16439655">http://www.ncbi.nlm.nih.gov/sites/entrez/16439655</a>       |
| HOT179_125m_cDNA.fasta               | Hot Aloha                           | 8       | 1        | <a href="http://www.ncbi.nlm.nih.gov/sites/entrez/16439655">http://www.ncbi.nlm.nih.gov/sites/entrez/16439655</a>       |
| HOT179_125m_gDNA.fasta               | Hot Aloha                           | 48      | 0        | <a href="http://www.ncbi.nlm.nih.gov/sites/entrez/16439655">http://www.ncbi.nlm.nih.gov/sites/entrez/16439655</a>       |
| HOT179_125m_SG.fasta                 | Hot Aloha                           | 95854   | 89065    | <a href="http://www.ncbi.nlm.nih.gov/sites/entrez/16439655">http://www.ncbi.nlm.nih.gov/sites/entrez/16439655</a>       |
| HOT179_25m_SG.fasta                  | Hot Aloha                           | 100844  | 92542    | <a href="http://www.ncbi.nlm.nih.gov/sites/entrez/16439655">http://www.ncbi.nlm.nih.gov/sites/entrez/16439655</a>       |
| JGI_SMP_L_HF10_10-07-02.fasta        | Hot Aloha                           | 4895    | 4562     | <a href="http://www.ncbi.nlm.nih.gov/sites/entrez/16439655">http://www.ncbi.nlm.nih.gov/sites/entrez/16439655</a>       |
| JGI_SMP_L_HF130_10-06-02.fasta       | Hot Aloha                           | 3429    | 3199     | <a href="http://www.ncbi.nlm.nih.gov/sites/entrez/16439655">http://www.ncbi.nlm.nih.gov/sites/entrez/16439655</a>       |
| JGI_SMP_L_HF4000_12-21-03.fasta      | Hot Aloha                           | 7396    | 7011     | <a href="http://www.ncbi.nlm.nih.gov/sites/entrez/16439655">http://www.ncbi.nlm.nih.gov/sites/entrez/16439655</a>       |
| JGI_SMP_L_HF500_10-06-02.fasta       | Hot Aloha                           | 5771    | 5409     | <a href="http://www.ncbi.nlm.nih.gov/sites/entrez/16439655">http://www.ncbi.nlm.nih.gov/sites/entrez/16439655</a>       |
| JGI_SMP_L_HF70_10-07-02.fasta        | Hot Aloha                           | 6834    | 6241     | <a href="http://www.ncbi.nlm.nih.gov/sites/entrez/16439655">http://www.ncbi.nlm.nih.gov/sites/entrez/16439655</a>       |
| BGI_GeneSet20090523.fasta            | Human microbiome Qin2010            | 1529492 | 1522788  | <a href="http://www.bork.embl.de/~arumugam/Qin_et_al_2010/">http://www.bork.embl.de/~arumugam/Qin_et_al_2010/</a>       |
| MH0001.seq.fasta                     | Human microbiome Qin2010            | 9705    | 9533     | <a href="http://www.bork.embl.de/~arumugam/Qin_et_al_2010/">http://www.bork.embl.de/~arumugam/Qin_et_al_2010/</a>       |
| MH0002.seq.fasta                     | Human microbiome Qin2010            | 44320   | 43499    | <a href="http://www.bork.embl.de/~arumugam/Qin_et_al_2010/">http://www.bork.embl.de/~arumugam/Qin_et_al_2010/</a>       |
| MH0003.seq.fasta                     | Human microbiome Qin2010            | 64601   | 63771    | <a href="http://www.bork.embl.de/~arumugam/Qin_et_al_2010/">http://www.bork.embl.de/~arumugam/Qin_et_al_2010/</a>       |
| MH0004.seq.fasta                     | Human microbiome Qin2010            | 14479   | 14281    | <a href="http://www.bork.embl.de/~arumugam/Qin_et_al_2010/">http://www.bork.embl.de/~arumugam/Qin_et_al_2010/</a>       |
| MH0005.seq.fasta                     | Human microbiome Qin2010            | 9064    | 8929     | <a href="http://www.bork.embl.de/~arumugam/Qin_et_al_2010/">http://www.bork.embl.de/~arumugam/Qin_et_al_2010/</a>       |
| MH0006.seq.fasta                     | Human microbiome Qin2010            | 100175  | 98429    | <a href="http://www.bork.embl.de/~arumugam/Qin_et_al_2010/">http://www.bork.embl.de/~arumugam/Qin_et_al_2010/</a>       |
| MH0007.seq.fasta                     | Human microbiome Qin2010            | 13227   | 12902    | <a href="http://www.bork.embl.de/~arumugam/Qin_et_al_2010/">http://www.bork.embl.de/~arumugam/Qin_et_al_2010/</a>       |
| MH0008.seq.fasta                     | Human microbiome Qin2010            | 18064   | 17786    | <a href="http://www.bork.embl.de/~arumugam/Qin_et_al_2010/">http://www.bork.embl.de/~arumugam/Qin_et_al_2010/</a>       |
| MH0009.seq.fasta                     | Human microbiome Qin2010            | 62530   | 61529    | <a href="http://www.bork.embl.de/~arumugam/Qin_et_al_2010/">http://www.bork.embl.de/~arumugam/Qin_et_al_2010/</a>       |
| MH0010.seq.fasta                     | Human microbiome Qin2010            | 16233   | 15984    | <a href="http://www.bork.embl.de/~arumugam/Qin_et_al_2010/">http://www.bork.embl.de/~arumugam/Qin_et_al_2010/</a>       |
| MH0011.seq.fasta                     | Human microbiome Qin2010            | 71135   | 70024    | <a href="http://www.bork.embl.de/~arumugam/Qin_et_al_2010/">http://www.bork.embl.de/~arumugam/Qin_et_al_2010/</a>       |
| MH0012.seq.fasta                     | Human microbiome Qin2010            | 132734  | 130930   | <a href="http://www.bork.embl.de/~arumugam/Qin_et_al_2010/">http://www.bork.embl.de/~arumugam/Qin_et_al_2010/</a>       |
| MH0013.seq.fasta                     | Human microbiome Qin2010            | 17551   | 17250    | <a href="http://www.bork.embl.de/~arumugam/Qin_et_al_2010/">http://www.bork.embl.de/~arumugam/Qin_et_al_2010/</a>       |
| MH0014.seq.fasta                     | Human microbiome Qin2010            | 68504   | 67622    | <a href="http://www.bork.embl.de/~arumugam/Qin_et_al_2010/">http://www.bork.embl.de/~arumugam/Qin_et_al_2010/</a>       |
| MH0015.seq.fasta                     | Human microbiome Qin2010            | 15686   | 15449    | <a href="http://www.bork.embl.de/~arumugam/Qin_et_al_2010/">http://www.bork.embl.de/~arumugam/Qin_et_al_2010/</a>       |
| MH0016.seq.fasta                     | Human microbiome Qin2010            | 62071   | 61212    | <a href="http://www.bork.embl.de/~arumugam/Qin_et_al_2010/">http://www.bork.embl.de/~arumugam/Qin_et_al_2010/</a>       |
| MH0017.seq.fasta                     | Human microbiome Qin2010            | 15527   | 15304    | <a href="http://www.bork.embl.de/~arumugam/Qin_et_al_2010/">http://www.bork.embl.de/~arumugam/Qin_et_al_2010/</a>       |
| MH0018.seq.fasta                     | Human microbiome Qin2010            | 7900    | 7753     | <a href="http://www.bork.embl.de/~arumugam/Qin_et_al_2010/">http://www.bork.embl.de/~arumugam/Qin_et_al_2010/</a>       |
| MH0019.seq.fasta                     | Human microbiome Qin2010            | 20115   | 19862    | <a href="http://www.bork.embl.de/~arumugam/Qin_et_al_2010/">http://www.bork.embl.de/~arumugam/Qin_et_al_2010/</a>       |
| MH0020.seq.fasta                     | Human microbiome Qin2010            | 58224   | 57572    | <a href="http://www.bork.embl.de/~arumugam/Qin_et_al_2010/">http://www.bork.embl.de/~arumugam/Qin_et_al_2010/</a>       |
| MH0021.seq.fasta                     | Human microbiome Qin2010            | 31315   | 30692    | <a href="http://www.bork.embl.de/~arumugam/Qin_et_al_2010/">http://www.bork.embl.de/~arumugam/Qin_et_al_2010/</a>       |
| MH0022.seq.fasta                     | Human microbiome Qin2010            | 13728   | 13555    | <a href="http://www.bork.embl.de/~arumugam/Qin_et_al_2010/">http://www.bork.embl.de/~arumugam/Qin_et_al_2010/</a>       |
| MH0023.seq.fasta                     | Human microbiome Qin2010            | 13938   | 13682    | <a href="http://www.bork.embl.de/~arumugam/Qin_et_al_2010/">http://www.bork.embl.de/~arumugam/Qin_et_al_2010/</a>       |
| MH0024.seq.fasta                     | Human microbiome Qin2010            | 24189   | 23767    | <a href="http://www.bork.embl.de/~arumugam/Qin_et_al_2010/">http://www.bork.embl.de/~arumugam/Qin_et_al_2010/</a>       |
| MH0025.seq.fasta                     | Human microbiome Qin2010            | 56058   | 55240    | <a href="http://www.bork.embl.de/~arumugam/Qin_et_al_2010/">http://www.bork.embl.de/~arumugam/Qin_et_al_2010/</a>       |
| MH0026.seq.fasta                     | Human microbiome Qin2010            | 41939   | 41397    | <a href="http://www.bork.embl.de/~arumugam/Qin_et_al_2010/">http://www.bork.embl.de/~arumugam/Qin_et_al_2010/</a>       |
| MH0027.seq.fasta                     | Human microbiome Qin2010            | 6413    | 6243     | <a href="http://www.bork.embl.de/~arumugam/Qin_et_al_2010/">http://www.bork.embl.de/~arumugam/Qin_et_al_2010/</a>       |
| MH0028.seq.fasta                     | Human microbiome Qin2010            | 57039   | 56252    | <a href="http://www.bork.embl.de/~arumugam/Qin_et_al_2010/">http://www.bork.embl.de/~arumugam/Qin_et_al_2010/</a>       |
| MH0030.seq.fasta                     | Human microbiome Qin2010            | 38721   | 38115    | <a href="http://www.bork.embl.de/~arumugam/Qin_et_al_2010/">http://www.bork.embl.de/~arumugam/Qin_et_al_2010/</a>       |
| MH0031.seq.fasta                     | Human microbiome Qin2010            | 38928   | 38135    | <a href="http://www.bork.embl.de/~arumugam/Qin_et_al_2010/">http://www.bork.embl.de/~arumugam/Qin_et_al_2010/</a>       |
| MH0032.seq.fasta                     | Human microbiome Qin2010            | 27622   | 27100    | <a href="http://www.bork.embl.de/~arumugam/Qin_et_al_2010/">http://www.bork.embl.de/~arumugam/Qin_et_al_2010/</a>       |
| MH0033.seq.fasta                     | Human microbiome Qin2010            | 56244   | 55389    | <a href="http://www.bork.embl.de/~arumugam/Qin_et_al_2010/">http://www.bork.embl.de/~arumugam/Qin_et_al_2010/</a>       |
| MH0034.seq.fasta                     | Human microbiome Qin2010            | 19967   | 19596    | <a href="http://www.bork.embl.de/~arumugam/Qin_et_al_2010/">http://www.bork.embl.de/~arumugam/Qin_et_al_2010/</a>       |
| MH0035.seq.fasta                     | Human microbiome Qin2010            | 51823   | 50897    | <a href="http://www.bork.embl.de/~arumugam/Qin_et_al_2010/">http://www.bork.embl.de/~arumugam/Qin_et_al_2010/</a>       |
| MH0036.seq.fasta                     | Human microbiome Qin2010            | 48730   | 48001    | <a href="http://www.bork.embl.de/~arumugam/Qin_et_al_2010/">http://www.bork.embl.de/~arumugam/Qin_et_al_2010/</a>       |
| MH0037.seq.fasta                     | Human microbiome Qin2010            | 43533   | 42915    | <a href="http://www.bork.embl.de/~arumugam/Qin_et_al_2010/">http://www.bork.embl.de/~arumugam/Qin_et_al_2010/</a>       |
| MH0038.seq.fasta                     | Human microbiome Qin2010            | 49904   | 49252    | <a href="http://www.bork.embl.de/~arumugam/Qin_et_al_2010/">http://www.bork.embl.de/~arumugam/Qin_et_al_2010/</a>       |
| MH0039.seq.fasta                     | Human microbiome Qin2010            | 52294   | 51348    | <a href="http://www.bork.embl.de/~arumugam/Qin_et_al_2010/">http://www.bork.embl.de/~arumugam/Qin_et_al_2010/</a>       |
| MH0040.seq.fasta                     | Human microbiome Qin2010            | 59139   | 58292    | <a href="http://www.bork.embl.de/~arumugam/Qin_et_al_2010/">http://www.bork.embl.de/~arumugam/Qin_et_al_2010/</a>       |
| MH0041.seq.fasta                     | Human microbiome Qin2010            | 49385   | 48631    | <a href="http://www.bork.embl.de/~arumugam/Qin_et_al_2010/">http://www.bork.embl.de/~arumugam/Qin_et_al_2010/</a>       |
| MH0042.seq.fasta                     | Human microbiome Qin2010            | 47677   | 46899    | <a href="http://www.bork.embl.de/~arumugam/Qin_et_al_2010/">http://www.bork.embl.de/~arumugam/Qin_et_al_2010/</a>       |
| MH0043.seq.fasta                     | Human microbiome Qin2010            | 59344   | 57951    | <a href="http://www.bork.embl.de/~arumugam/Qin_et_al_2010/">http://www.bork.embl.de/~arumugam/Qin_et_al_2010/</a>       |
| MH0044.seq.fasta                     | Human microbiome Qin2010            | 56873   | 56065    | <a href="http://www.bork.embl.de/~arumugam/Qin_et_al_2010/">http://www.bork.embl.de/~arumugam/Qin_et_al_2010/</a>       |
| MH0045.seq.fasta                     | Human microbiome Qin2010            | 46126   | 45316    | <a href="http://www.bork.embl.de/~arumugam/Qin_et_al_2010/">http://www.bork.embl.de/~arumugam/Qin_et_al_2010/</a>       |
| MH0046.seq.fasta                     | Human microbiome Qin2010            | 41238   | 40594    | <a href="http://www.bork.embl.de/~arumugam/Qin_et_al_2010/">http://www.bork.embl.de/~arumugam/Qin_et_al_2010/</a>       |
| MH0047.seq.fasta                     | Human microbiome Qin2010            | 18183   | 17849    | <a href="http://www.bork.embl.de/~arumugam/Qin_et_al_2010/">http://www.bork.embl.de/~arumugam/Qin_et_al_2010/</a>       |
| MH0048.seq.fasta                     | Human microbiome Qin2010            | 26290   | 25732    | <a href="http://www.bork.embl.de/~arumugam/Qin_et_al_2010/">http://www.bork.embl.de/~arumugam/Qin_et_al_2010/</a>       |
| MH0049.seq.fasta                     | Human microbiome Qin2010            | 25082   | 24696    | <a href="http://www.bork.embl.de/~arumugam/Qin_et_al_2010/">http://www.bork.embl.de/~arumugam/Qin_et_al_2010/</a>       |
| MH0050.seq.fasta                     | Human microbiome Qin2010            | 55374   | 54459    | <a href="http://www.bork.embl.de/~arumugam/Qin_et_al_2010/">http://www.bork.embl.de/~arumugam/Qin_et_al_2010/</a>       |
| MH0051.seq.fasta                     | Human microbiome Qin2010            | 28884   | 28289    | <a href="http://www.bork.embl.de/~arumugam/Qin_et_al_2010/">http://www.bork.embl.de/~arumugam/Qin_et_al_2010/</a>       |
| MH0052.seq.fasta                     | Human microbiome Qin2010            | 32570   | 31926    | <a href="http://www.bork.embl.de/~arumugam/Qin_et_al_2010/">http://www.bork.embl.de/~arumugam/Qin_et_al_2010/</a>       |
| MH0053.seq.fasta                     | Human microbiome Qin2010            | 48379   | 47704    | <a href="http://www.bork.embl.de/~arumugam/Qin_et_al_2010/">http://www.bork.embl.de/~arumugam/Qin_et_al_2010/</a>       |
| MH0054.seq.fasta                     | Human microbiome Qin2010            | 56449   | 55737    | <a href="http://www.bork.embl.de/~arumugam/Qin_et_al_2010/">http://www.bork.embl.de/~arumugam/Qin_et_al_2010/</a>       |
| MH0055.seq.fasta                     | Human microbiome Qin2010            | 56526   | 55737    | <a href="http://www.bork.embl.de/~arumugam/Qin_et_al_2010/">http://www.bork.embl.de/~arumugam/Qin_et_al_2010/</a>       |
| MH0056.seq.fasta                     | Human microbiome Qin2010            | 44156   | 43388    | <a href="http://www.bork.embl.de/~arumugam/Qin_et_al_2010/">http://www.bork.embl.de/~arumugam/Qin_et_al_2010/</a>       |
| MH0057.seq.fasta                     | Human microbiome Qin2010            | 38384   | 37900    | <a href="http://www.bork.embl.de/~arumugam/Qin_et_al_2010/">http://www.bork.embl.de/~arumugam/Qin_et_al_2010/</a>       |
| MH0058.seq.fasta                     | Human microbiome Qin2010            | 58074   | 57099    | <a href="http://www.bork.embl.de/~arumugam/Qin_et_al_2010/">http://www.bork.embl.de/~arumugam/Qin_et_al_2010/</a>       |
| MH0059.seq.fasta                     | Human microbiome Qin2010            | 63906   | 62895    | <a href="http://www.bork.embl.de/~arumugam/Qin_et_al_2010/">http://www.bork.embl.de/~arumugam/Qin_et_al_2010/</a>       |
| MH0060.seq.fasta                     | Human microbiome Qin2010            | 46461   | 45824    | <a href="http://www.bork.embl.de/~arumugam/Qin_et_al_2010/">http://www.bork.embl.de/~arumugam/Qin_et_al_2010/</a>       |
| MH0061.seq.fasta                     | Human microbiome Qin2010            | 43172   | 42596    | <a href="http://www.bork.embl.de/~arumugam/Qin_et_al_2010/">http://www.bork.embl.de/~arumugam/Qin_et_al_2010/</a>       |
| MH0062.seq.fasta                     | Human microbiome Qin2010            | 46012   | 45325    | <a href="http://www.bork.embl.de/~arumugam/Qin_et_al_2010/">http://www.bork.embl.de/~arumugam/Qin_et_al_2010/</a>       |
| MH0063.seq.fasta                     | Human microbiome Qin2010            | 46152   | 45339    | <a href="http://www.bork.embl.de/~arumugam/Qin_et_al_2010/">http://www.bork.embl.de/~arumugam/Qin_et_al_2010/</a>       |
| MH0064.seq.fasta                     | Human microbiome Qin2010            | 45251   | 44502    | <a href="http://www.bork.embl.de/~arumugam/Qin_et_al_2010/">http://www.bork.embl.de/~arumugam/Qin_et_al_2010/</a>       |
| MH0065.seq.fasta                     | Human microbiome Qin2010            | 56359   | 55320    | <a href="http://www.bork.embl.de/~arumugam/Qin_et_al_2010/">http://www.bork.embl.de/~arumugam/Qin_et_al_2010/</a>       |
| MH0066.seq.fasta                     | Human microbiome Qin2010            | 50140   | 49495    | <a href="http://www.bork.embl.de/~arumugam/Qin_et_al_2010/">http://www.bork.embl.de/~arumugam/Qin_et_al_2010/</a>       |
| MH0067.seq.fasta                     | Human microbiome Qin2010            | 58076   | 57420    | <a href="http://www.bork.embl.de/~arumugam/Qin_et_al_2010/">http://www.bork.embl.de/~arumugam/Qin_et_al_2010/</a>       |
| MH0068.seq.fasta                     | Human microbiome Qin2010            | 47259   | 46673    | <a href="http://www.bork.embl.de/~arumugam/Qin_et_al_2010/">http://www.bork.embl.de/~arumugam/Qin_et_al_2010/</a>       |
| MH0069.seq.fasta                     | Human microbiome Qin2010            | 60995   | 59910    | <a href="http://www.bork.embl.de/~arumugam/Qin_et_al_2010/">http://www.bork.embl.de/~arumugam/Qin_et_al_2010/</a>       |
| MH0070.seq.fasta                     | Human microbiome Qin2010            | 60653   | 59545    | <a href="http://www.bork.embl.de/~arumugam/Qin_et_al_2010/">http://www.bork.embl.de/~arumugam/Qin_et_al_2010/</a>       |
| MH0071.seq.fasta                     | Human microbiome Qin2010            | 51469   | 50739    | <a href="http://www.bork.embl.de/~arumugam/Qin_et_al_2010/">http://www.bork.embl.de/~arumugam/Qin_et_al_2010/</a>       |

|                            |                                                           |       |       |                                                                                                                         |
|----------------------------|-----------------------------------------------------------|-------|-------|-------------------------------------------------------------------------------------------------------------------------|
| MH0072.seq.fasta           | Human microbiome Qin2010                                  | 36370 | 35662 | <a href="http://www.bork.embl.de/~arumugam/Qin_et_al_2010/">http://www.bork.embl.de/~arumugam/Qin_et_al_2010/</a>       |
| MH0073.seq.fasta           | Human microbiome Qin2010                                  | 43953 | 43219 | <a href="http://www.bork.embl.de/~arumugam/Qin_et_al_2010/">http://www.bork.embl.de/~arumugam/Qin_et_al_2010/</a>       |
| MH0074.seq.fasta           | Human microbiome Qin2010                                  | 57619 | 56976 | <a href="http://www.bork.embl.de/~arumugam/Qin_et_al_2010/">http://www.bork.embl.de/~arumugam/Qin_et_al_2010/</a>       |
| MH0075.seq.fasta           | Human microbiome Qin2010                                  | 53166 | 52311 | <a href="http://www.bork.embl.de/~arumugam/Qin_et_al_2010/">http://www.bork.embl.de/~arumugam/Qin_et_al_2010/</a>       |
| MH0076.seq.fasta           | Human microbiome Qin2010                                  | 39036 | 38281 | <a href="http://www.bork.embl.de/~arumugam/Qin_et_al_2010/">http://www.bork.embl.de/~arumugam/Qin_et_al_2010/</a>       |
| MH0077.seq.fasta           | Human microbiome Qin2010                                  | 54384 | 53366 | <a href="http://www.bork.embl.de/~arumugam/Qin_et_al_2010/">http://www.bork.embl.de/~arumugam/Qin_et_al_2010/</a>       |
| MH0078.seq.fasta           | Human microbiome Qin2010                                  | 15078 | 14700 | <a href="http://www.bork.embl.de/~arumugam/Qin_et_al_2010/">http://www.bork.embl.de/~arumugam/Qin_et_al_2010/</a>       |
| MH0079.seq.fasta           | Human microbiome Qin2010                                  | 31877 | 31286 | <a href="http://www.bork.embl.de/~arumugam/Qin_et_al_2010/">http://www.bork.embl.de/~arumugam/Qin_et_al_2010/</a>       |
| MH0080.seq.fasta           | Human microbiome Qin2010                                  | 58876 | 57787 | <a href="http://www.bork.embl.de/~arumugam/Qin_et_al_2010/">http://www.bork.embl.de/~arumugam/Qin_et_al_2010/</a>       |
| MH0081.seq.fasta           | Human microbiome Qin2010                                  | 56013 | 55022 | <a href="http://www.bork.embl.de/~arumugam/Qin_et_al_2010/">http://www.bork.embl.de/~arumugam/Qin_et_al_2010/</a>       |
| MH0082.seq.fasta           | Human microbiome Qin2010                                  | 61842 | 60761 | <a href="http://www.bork.embl.de/~arumugam/Qin_et_al_2010/">http://www.bork.embl.de/~arumugam/Qin_et_al_2010/</a>       |
| MH0083.seq.fasta           | Human microbiome Qin2010                                  | 57445 | 56657 | <a href="http://www.bork.embl.de/~arumugam/Qin_et_al_2010/">http://www.bork.embl.de/~arumugam/Qin_et_al_2010/</a>       |
| MH0084.seq.fasta           | Human microbiome Qin2010                                  | 25963 | 25593 | <a href="http://www.bork.embl.de/~arumugam/Qin_et_al_2010/">http://www.bork.embl.de/~arumugam/Qin_et_al_2010/</a>       |
| MH0085.seq.fasta           | Human microbiome Qin2010                                  | 45650 | 45039 | <a href="http://www.bork.embl.de/~arumugam/Qin_et_al_2010/">http://www.bork.embl.de/~arumugam/Qin_et_al_2010/</a>       |
| MH0086.seq.fasta           | Human microbiome Qin2010                                  | 80256 | 79130 | <a href="http://www.bork.embl.de/~arumugam/Qin_et_al_2010/">http://www.bork.embl.de/~arumugam/Qin_et_al_2010/</a>       |
| O2.UC-1.seq.fasta          | Human microbiome Qin2010                                  | 34915 | 34310 | <a href="http://www.bork.embl.de/~arumugam/Qin_et_al_2010/">http://www.bork.embl.de/~arumugam/Qin_et_al_2010/</a>       |
| O2.UC-11.seq.fasta         | Human microbiome Qin2010                                  | 26276 | 25651 | <a href="http://www.bork.embl.de/~arumugam/Qin_et_al_2010/">http://www.bork.embl.de/~arumugam/Qin_et_al_2010/</a>       |
| O2.UC-12.seq.fasta         | Human microbiome Qin2010                                  | 41536 | 40802 | <a href="http://www.bork.embl.de/~arumugam/Qin_et_al_2010/">http://www.bork.embl.de/~arumugam/Qin_et_al_2010/</a>       |
| O2.UC-13.seq.fasta         | Human microbiome Qin2010                                  | 54232 | 53346 | <a href="http://www.bork.embl.de/~arumugam/Qin_et_al_2010/">http://www.bork.embl.de/~arumugam/Qin_et_al_2010/</a>       |
| O2.UC-14.seq.fasta         | Human microbiome Qin2010                                  | 22202 | 21763 | <a href="http://www.bork.embl.de/~arumugam/Qin_et_al_2010/">http://www.bork.embl.de/~arumugam/Qin_et_al_2010/</a>       |
| O2.UC-16.seq.fasta         | Human microbiome Qin2010                                  | 16427 | 16037 | <a href="http://www.bork.embl.de/~arumugam/Qin_et_al_2010/">http://www.bork.embl.de/~arumugam/Qin_et_al_2010/</a>       |
| O2.UC-17.seq.fasta         | Human microbiome Qin2010                                  | 19239 | 18886 | <a href="http://www.bork.embl.de/~arumugam/Qin_et_al_2010/">http://www.bork.embl.de/~arumugam/Qin_et_al_2010/</a>       |
| O2.UC-18.seq.fasta         | Human microbiome Qin2010                                  | 44325 | 43853 | <a href="http://www.bork.embl.de/~arumugam/Qin_et_al_2010/">http://www.bork.embl.de/~arumugam/Qin_et_al_2010/</a>       |
| O2.UC-19.seq.fasta         | Human microbiome Qin2010                                  | 47826 | 47108 | <a href="http://www.bork.embl.de/~arumugam/Qin_et_al_2010/">http://www.bork.embl.de/~arumugam/Qin_et_al_2010/</a>       |
| O2.UC-20.seq.fasta         | Human microbiome Qin2010                                  | 40938 | 40247 | <a href="http://www.bork.embl.de/~arumugam/Qin_et_al_2010/">http://www.bork.embl.de/~arumugam/Qin_et_al_2010/</a>       |
| O2.UC-21.seq.fasta         | Human microbiome Qin2010                                  | 20628 | 20236 | <a href="http://www.bork.embl.de/~arumugam/Qin_et_al_2010/">http://www.bork.embl.de/~arumugam/Qin_et_al_2010/</a>       |
| O2.UC-22.seq.fasta         | Human microbiome Qin2010                                  | 49015 | 48251 | <a href="http://www.bork.embl.de/~arumugam/Qin_et_al_2010/">http://www.bork.embl.de/~arumugam/Qin_et_al_2010/</a>       |
| O2.UC-23.seq.fasta         | Human microbiome Qin2010                                  | 32607 | 32151 | <a href="http://www.bork.embl.de/~arumugam/Qin_et_al_2010/">http://www.bork.embl.de/~arumugam/Qin_et_al_2010/</a>       |
| O2.UC-24.seq.fasta         | Human microbiome Qin2010                                  | 40718 | 40103 | <a href="http://www.bork.embl.de/~arumugam/Qin_et_al_2010/">http://www.bork.embl.de/~arumugam/Qin_et_al_2010/</a>       |
| O2.UC-4.seq.fasta          | Human microbiome Qin2010                                  | 45174 | 44394 | <a href="http://www.bork.embl.de/~arumugam/Qin_et_al_2010/">http://www.bork.embl.de/~arumugam/Qin_et_al_2010/</a>       |
| V1.CD-1.seq.fasta          | Human microbiome Qin2010                                  | 29601 | 29146 | <a href="http://www.bork.embl.de/~arumugam/Qin_et_al_2010/">http://www.bork.embl.de/~arumugam/Qin_et_al_2010/</a>       |
| V1.CD-11.seq.fasta         | Human microbiome Qin2010                                  | 50757 | 50062 | <a href="http://www.bork.embl.de/~arumugam/Qin_et_al_2010/">http://www.bork.embl.de/~arumugam/Qin_et_al_2010/</a>       |
| V1.CD-12.seq.fasta         | Human microbiome Qin2010                                  | 29767 | 29272 | <a href="http://www.bork.embl.de/~arumugam/Qin_et_al_2010/">http://www.bork.embl.de/~arumugam/Qin_et_al_2010/</a>       |
| V1.CD-13.seq.fasta         | Human microbiome Qin2010                                  | 54407 | 53533 | <a href="http://www.bork.embl.de/~arumugam/Qin_et_al_2010/">http://www.bork.embl.de/~arumugam/Qin_et_al_2010/</a>       |
| V1.CD-14.seq.fasta         | Human microbiome Qin2010                                  | 60291 | 59339 | <a href="http://www.bork.embl.de/~arumugam/Qin_et_al_2010/">http://www.bork.embl.de/~arumugam/Qin_et_al_2010/</a>       |
| V1.CD-15.seq.fasta         | Human microbiome Qin2010                                  | 30238 | 29885 | <a href="http://www.bork.embl.de/~arumugam/Qin_et_al_2010/">http://www.bork.embl.de/~arumugam/Qin_et_al_2010/</a>       |
| V1.CD-2.seq.fasta          | Human microbiome Qin2010                                  | 8200  | 7417  | <a href="http://www.bork.embl.de/~arumugam/Qin_et_al_2010/">http://www.bork.embl.de/~arumugam/Qin_et_al_2010/</a>       |
| V1.CD-3.seq.fasta          | Human microbiome Qin2010                                  | 37699 | 37172 | <a href="http://www.bork.embl.de/~arumugam/Qin_et_al_2010/">http://www.bork.embl.de/~arumugam/Qin_et_al_2010/</a>       |
| V1.CD-4.seq.fasta          | Human microbiome Qin2010                                  | 52488 | 51632 | <a href="http://www.bork.embl.de/~arumugam/Qin_et_al_2010/">http://www.bork.embl.de/~arumugam/Qin_et_al_2010/</a>       |
| V1.CD-6.seq.fasta          | Human microbiome Qin2010                                  | 37845 | 37236 | <a href="http://www.bork.embl.de/~arumugam/Qin_et_al_2010/">http://www.bork.embl.de/~arumugam/Qin_et_al_2010/</a>       |
| V1.CD-8.seq.fasta          | Human microbiome Qin2010                                  | 60741 | 59778 | <a href="http://www.bork.embl.de/~arumugam/Qin_et_al_2010/">http://www.bork.embl.de/~arumugam/Qin_et_al_2010/</a>       |
| V1.CD-9.seq.fasta          | Human microbiome Qin2010                                  | 57918 | 57191 | <a href="http://www.bork.embl.de/~arumugam/Qin_et_al_2010/">http://www.bork.embl.de/~arumugam/Qin_et_al_2010/</a>       |
| V1.UC-10.seq.fasta         | Human microbiome Qin2010                                  | 59332 | 58430 | <a href="http://www.bork.embl.de/~arumugam/Qin_et_al_2010/">http://www.bork.embl.de/~arumugam/Qin_et_al_2010/</a>       |
| V1.UC-13.seq.fasta         | Human microbiome Qin2010                                  | 49182 | 48634 | <a href="http://www.bork.embl.de/~arumugam/Qin_et_al_2010/">http://www.bork.embl.de/~arumugam/Qin_et_al_2010/</a>       |
| V1.UC-14.seq.fasta         | Human microbiome Qin2010                                  | 54997 | 54081 | <a href="http://www.bork.embl.de/~arumugam/Qin_et_al_2010/">http://www.bork.embl.de/~arumugam/Qin_et_al_2010/</a>       |
| V1.UC-15.seq.fasta         | Human microbiome Qin2010                                  | 57413 | 56649 | <a href="http://www.bork.embl.de/~arumugam/Qin_et_al_2010/">http://www.bork.embl.de/~arumugam/Qin_et_al_2010/</a>       |
| V1.UC-17.seq.fasta         | Human microbiome Qin2010                                  | 41186 | 40548 | <a href="http://www.bork.embl.de/~arumugam/Qin_et_al_2010/">http://www.bork.embl.de/~arumugam/Qin_et_al_2010/</a>       |
| V1.UC-18.seq.fasta         | Human microbiome Qin2010                                  | 50305 | 49678 | <a href="http://www.bork.embl.de/~arumugam/Qin_et_al_2010/">http://www.bork.embl.de/~arumugam/Qin_et_al_2010/</a>       |
| V1.UC-19.seq.fasta         | Human microbiome Qin2010                                  | 64271 | 63314 | <a href="http://www.bork.embl.de/~arumugam/Qin_et_al_2010/">http://www.bork.embl.de/~arumugam/Qin_et_al_2010/</a>       |
| V1.UC-21.seq.fasta         | Human microbiome Qin2010                                  | 47694 | 46908 | <a href="http://www.bork.embl.de/~arumugam/Qin_et_al_2010/">http://www.bork.embl.de/~arumugam/Qin_et_al_2010/</a>       |
| V1.UC-6.seq.fasta          | Human microbiome Qin2010                                  | 58897 | 57916 | <a href="http://www.bork.embl.de/~arumugam/Qin_et_al_2010/">http://www.bork.embl.de/~arumugam/Qin_et_al_2010/</a>       |
| V1.UC-7.seq.fasta          | Human microbiome Qin2010                                  | 28217 | 27872 | <a href="http://www.bork.embl.de/~arumugam/Qin_et_al_2010/">http://www.bork.embl.de/~arumugam/Qin_et_al_2010/</a>       |
| V1.UC-8.seq.fasta          | Human microbiome Qin2010                                  | 65498 | 64408 | <a href="http://www.bork.embl.de/~arumugam/Qin_et_al_2010/">http://www.bork.embl.de/~arumugam/Qin_et_al_2010/</a>       |
| V1.UC-9.seq.fasta          | Human microbiome Qin2010                                  | 50267 | 49485 | <a href="http://www.bork.embl.de/~arumugam/Qin_et_al_2010/">http://www.bork.embl.de/~arumugam/Qin_et_al_2010/</a>       |
| F1S.fasta                  | Japanese Microbiome                                       | 26089 | 24920 | <a href="http://www.ncbi.nlm.nih.gov/pubmed/17916580">http://www.ncbi.nlm.nih.gov/pubmed/17916580</a>                   |
| F1T.fasta                  | Japanese Microbiome                                       | 26164 | 24971 | <a href="http://www.ncbi.nlm.nih.gov/pubmed/17916580">http://www.ncbi.nlm.nih.gov/pubmed/17916580</a>                   |
| F1U.fasta                  | Japanese Microbiome                                       | 18319 | 17476 | <a href="http://www.ncbi.nlm.nih.gov/pubmed/17916580">http://www.ncbi.nlm.nih.gov/pubmed/17916580</a>                   |
| F2V.fasta                  | Japanese Microbiome                                       | 29005 | 27659 | <a href="http://www.ncbi.nlm.nih.gov/pubmed/17916580">http://www.ncbi.nlm.nih.gov/pubmed/17916580</a>                   |
| F2W.fasta                  | Japanese Microbiome                                       | 27387 | 26191 | <a href="http://www.ncbi.nlm.nih.gov/pubmed/17916580">http://www.ncbi.nlm.nih.gov/pubmed/17916580</a>                   |
| F2X.fasta                  | Japanese Microbiome                                       | 25712 | 24569 | <a href="http://www.ncbi.nlm.nih.gov/pubmed/17916580">http://www.ncbi.nlm.nih.gov/pubmed/17916580</a>                   |
| F2Y.fasta                  | Japanese Microbiome                                       | 29424 | 28194 | <a href="http://www.ncbi.nlm.nih.gov/pubmed/17916580">http://www.ncbi.nlm.nih.gov/pubmed/17916580</a>                   |
| InA.fasta                  | Japanese Microbiome                                       | 20271 | 19417 | <a href="http://www.ncbi.nlm.nih.gov/pubmed/17916580">http://www.ncbi.nlm.nih.gov/pubmed/17916580</a>                   |
| InB.fasta                  | Japanese Microbiome                                       | 9887  | 9528  | <a href="http://www.ncbi.nlm.nih.gov/pubmed/17916580">http://www.ncbi.nlm.nih.gov/pubmed/17916580</a>                   |
| InD.fasta                  | Japanese Microbiome                                       | 31760 | 30268 | <a href="http://www.ncbi.nlm.nih.gov/pubmed/17916580">http://www.ncbi.nlm.nih.gov/pubmed/17916580</a>                   |
| InE.fasta                  | Japanese Microbiome                                       | 18796 | 17871 | <a href="http://www.ncbi.nlm.nih.gov/pubmed/17916580">http://www.ncbi.nlm.nih.gov/pubmed/17916580</a>                   |
| InM.fasta                  | Japanese Microbiome                                       | 19268 | 18619 | <a href="http://www.ncbi.nlm.nih.gov/pubmed/17916580">http://www.ncbi.nlm.nih.gov/pubmed/17916580</a>                   |
| InR.fasta                  | Japanese Microbiome                                       | 29183 | 27723 | <a href="http://www.ncbi.nlm.nih.gov/pubmed/17916580">http://www.ncbi.nlm.nih.gov/pubmed/17916580</a>                   |
| 4440463.3.fasta            | Lean Mice                                                 | 4014  | 3797  | <a href="http://www.ncbi.nlm.nih.gov/pubmed/17916580">http://www.ncbi.nlm.nih.gov/pubmed/17916580</a>                   |
| 4440041.3.fasta            | Line Islands Christmas Reef B3 bacteria                   | 5     | 2     | <a href="http://www.ncbi.nlm.nih.gov/pubmed/17916580">http://www.ncbi.nlm.nih.gov/pubmed/17916580</a>                   |
| 4440037.3.fasta            | Line Islands Kingman Reef B2 bacteria                     | 3     | 0     | <a href="http://www.ncbi.nlm.nih.gov/pubmed/17916580">http://www.ncbi.nlm.nih.gov/pubmed/17916580</a>                   |
| 4440039.3.fasta            | Line Islands Palmyra F8 Bacteria                          | 15    | 0     | <a href="http://www.ncbi.nlm.nih.gov/pubmed/17916580">http://www.ncbi.nlm.nih.gov/pubmed/17916580</a>                   |
| 4440279.3.fasta            | Line Islands Tabuaeran B1 Bacteria                        | 3     | 0     | <a href="http://www.ncbi.nlm.nih.gov/pubmed/17916580">http://www.ncbi.nlm.nih.gov/pubmed/17916580</a>                   |
| 4440426.3.fasta            | Low salinity microbial (LB1128)                           | 3     | 0     | <a href="http://www.theseed.org/DinsdaleSupplementalMaterial/">http://www.theseed.org/DinsdaleSupplementalMaterial/</a> |
| 4440437.3.fasta            | Low saltern microbes (Pond 11)                            | 7     | 0     | <a href="http://www.theseed.org/DinsdaleSupplementalMaterial/">http://www.theseed.org/DinsdaleSupplementalMaterial/</a> |
| 4440425.3.fasta            | Medium salinity microbial (MB1116)                        | 0     | 0     | <a href="http://www.theseed.org/DinsdaleSupplementalMaterial/">http://www.theseed.org/DinsdaleSupplementalMaterial/</a> |
| 4440435.3.fasta            | Medium saltern microbes (MB1110)                          | 1     | 0     | <a href="http://www.theseed.org/DinsdaleSupplementalMaterial/">http://www.theseed.org/DinsdaleSupplementalMaterial/</a> |
| 4440434.3.fasta            | Medium saltern microbes (MB1111)                          | 0     | 0     | <a href="http://www.theseed.org/DinsdaleSupplementalMaterial/">http://www.theseed.org/DinsdaleSupplementalMaterial/</a> |
| 4440416.3.fasta            | Medium saltern microbial (MB1128)                         | 0     | 0     | <a href="http://www.theseed.org/DinsdaleSupplementalMaterial/">http://www.theseed.org/DinsdaleSupplementalMaterial/</a> |
| mb2000jd298_1.fasta        | Monterey Bay                                              | 7707  | 5069  | <a href="http://www.ncbi.nlm.nih.gov/pubmed/17916580">http://www.ncbi.nlm.nih.gov/pubmed/17916580</a>                   |
| mb2000jd298_2.fasta        | Monterey Bay                                              | 6667  | 4419  | <a href="http://www.ncbi.nlm.nih.gov/pubmed/17916580">http://www.ncbi.nlm.nih.gov/pubmed/17916580</a>                   |
| mb2001jd115_1.fasta        | Monterey Bay                                              | 5145  | 3456  | <a href="http://www.ncbi.nlm.nih.gov/pubmed/17916580">http://www.ncbi.nlm.nih.gov/pubmed/17916580</a>                   |
| mb2001jd115_2.fasta        | Monterey Bay                                              | 4909  | 3211  | <a href="http://www.ncbi.nlm.nih.gov/pubmed/17916580">http://www.ncbi.nlm.nih.gov/pubmed/17916580</a>                   |
| mb2001jd135_1.fasta        | Monterey Bay                                              | 6658  | 4435  | <a href="http://www.ncbi.nlm.nih.gov/pubmed/17916580">http://www.ncbi.nlm.nih.gov/pubmed/17916580</a>                   |
| mb2001jd135_2.fasta        | Monterey Bay                                              | 5596  | 3662  | <a href="http://www.ncbi.nlm.nih.gov/pubmed/17916580">http://www.ncbi.nlm.nih.gov/pubmed/17916580</a>                   |
| 4440056.3.fasta            | Morbid gut bacteria                                       | 1     | 1     | <a href="http://www.ncbi.nlm.nih.gov/pubmed/17916580">http://www.ncbi.nlm.nih.gov/pubmed/17916580</a>                   |
| 4440066.3.fasta            | Morbid slime bacteria                                     | 2     | 0     | <a href="http://www.ncbi.nlm.nih.gov/pubmed/17916580">http://www.ncbi.nlm.nih.gov/pubmed/17916580</a>                   |
| 4440464.3.fasta            | Obese Mice                                                | 4841  | 4490  | <a href="http://www.ncbi.nlm.nih.gov/pubmed/17916580">http://www.ncbi.nlm.nih.gov/pubmed/17916580</a>                   |
| NCBI_projectID_13729.fasta | Pacific Beach                                             | 4480  | 4339  | <a href="http://www.ncbi.nlm.nih.gov/pubmed/17916580">http://www.ncbi.nlm.nih.gov/pubmed/17916580</a>                   |
| 4440319.3.fasta            | Porites astreoides microbial extraction                   | 13    | 0     | <a href="http://www.ncbi.nlm.nih.gov/pubmed/17916580">http://www.ncbi.nlm.nih.gov/pubmed/17916580</a>                   |
| 4440378.3.fasta            | Porites compressa control treated bacteria                | 8     | 0     | <a href="http://www.ncbi.nlm.nih.gov/pubmed/17916580">http://www.ncbi.nlm.nih.gov/pubmed/17916580</a>                   |
| 4440372.3.fasta            | Porites compressa DOC treated microbes                    | 2     | 0     | <a href="http://www.ncbi.nlm.nih.gov/pubmed/17916580">http://www.ncbi.nlm.nih.gov/pubmed/17916580</a>                   |
| 4440381.3.fasta            | Porites compressa nutrient treated microbes               | 3     | 0     | <a href="http://www.ncbi.nlm.nih.gov/pubmed/17916580">http://www.ncbi.nlm.nih.gov/pubmed/17916580</a>                   |
| 4440379.3.fasta            | Porites compressa pH treated microbes                     | 3     | 0     | <a href="http://www.ncbi.nlm.nih.gov/pubmed/17916580">http://www.ncbi.nlm.nih.gov/pubmed/17916580</a>                   |
| 4440373.3.fasta            | Porites compressa temperature treated bacteria            | 3     | 0     | <a href="http://www.ncbi.nlm.nih.gov/pubmed/17916580">http://www.ncbi.nlm.nih.gov/pubmed/17916580</a>                   |
| 4440380.3.fasta            | Porites compressa time zero bacteria                      | 2     | 0     | <a href="http://www.ncbi.nlm.nih.gov/pubmed/17916580">http://www.ncbi.nlm.nih.gov/pubmed/17916580</a>                   |
| 4440067.3.fasta            | Pozas Azule II stromatolite microbes                      | 12    | 0     | <a href="http://www.theseed.org/DinsdaleSupplementalMaterial/">http://www.theseed.org/DinsdaleSupplementalMaterial/</a> |
| 4440060.3.fasta            | Rios Mesquites Stromatolites bacteria                     | 64    | 1     | <a href="http://www.theseed.org/DinsdaleSupplementalMaterial/">http://www.theseed.org/DinsdaleSupplementalMaterial/</a> |
| 4440329.3.fasta            | Salton Sea Bacteria 1                                     | 5     | 0     | <a href="http://www.theseed.org/DinsdaleSupplementalMaterial/">http://www.theseed.org/DinsdaleSupplementalMaterial/</a> |
| FN56_all.fasta             | Sapelo Island                                             | 11286 | 6185  | <a href="http://www.ncbi.nlm.nih.gov/pubmed/20844569">http://www.ncbi.nlm.nih.gov/pubmed/20844569</a>                   |
| FN57_all.fasta             | Sapelo Island                                             | 10427 | 5705  | <a href="http://www.ncbi.nlm.nih.gov/pubmed/20844569">http://www.ncbi.nlm.nih.gov/pubmed/20844569</a>                   |
| 4440282.3.fasta            | Soudan Black Stuff                                        | 14    | 0     | <a href="http://www.theseed.org/DinsdaleSupplementalMaterial/">http://www.theseed.org/DinsdaleSupplementalMaterial/</a> |
| 4440281.3.fasta            | Soudan Red Stuff                                          | 30    | 3     | <a href="http://www.theseed.org/DinsdaleSupplementalMaterial/">http://www.theseed.org/DinsdaleSupplementalMaterial/</a> |
| BC3.fasta                  | Syntrophic Partners                                       | 2217  | 1493  | <a href="https://portal.camera.calit2.net/gridsphere/">https://portal.camera.calit2.net/gridsphere/</a>                 |
| MDA.fasta                  | Syntrophic Partners                                       | 2404  | 1941  | <a href="https://portal.camera.calit2.net/gridsphere/">https://portal.camera.calit2.net/gridsphere/</a>                 |
| 4440440.3.fasta            | Tilapia pond microbes                                     | 23    | 0     | <a href="http://www.theseed.org/DinsdaleSupplementalMaterial/">http://www.theseed.org/DinsdaleSupplementalMaterial/</a> |
| 4440355.3.fasta            | Total microbial community from cow rumens                 | 7     | 0     | <a href="http://www.theseed.org/DinsdaleSupplementalMaterial/">http://www.theseed.org/DinsdaleSupplementalMaterial/</a> |
| 4440356.3.fasta            | Total microbial community from cow rumens                 | 3     | 1     | <a href="http://www.theseed.org/DinsdaleSupplementalMaterial/">http://www.theseed.org/DinsdaleSupplementalMaterial/</a> |
| 4440357.3.fasta            | Total microbial community from cow rumens                 | 7     | 0     | <a href="http://www.theseed.org/DinsdaleSupplementalMaterial/">http://www.theseed.org/DinsdaleSupplementalMaterial/</a> |
| 4440387.3.fasta            | Total microbial community from cow rumens                 | 8     | 0     | <a href="http://www.theseed.org/DinsdaleSupplementalMaterial/">http://www.theseed.org/DinsdaleSupplementalMaterial/</a> |
| 4440360.3.fasta            | Total microbial community from DMSP treated seawater      | 1     | 0     | <a href="http://www.theseed.org/DinsdaleSupplementalMaterial/">http://www.theseed.org/DinsdaleSupplementalMaterial/</a> |
| 4440364.3.fasta            | Total microbial community from DMSP treated seawater      | 1     | 0     | <a href="http://www.theseed.org/DinsdaleSupplementalMaterial/">http://www.theseed.org/DinsdaleSupplementalMaterial/</a> |
| 4440363.3.fasta            | Total microbial community from Vanillate treated seawater | 2     | 0     | <a href="http://www.theseed.org/DinsdaleSupplementalMaterial/">http://www.theseed.org/DinsdaleSupplementalMaterial/</a> |
| 4440365.3.fasta            | Total microbial community from Vanillate treated seawater | 0     | 0     | <a href="http://www.theseed.org/DinsdaleSupplementalMaterial/">http://www.theseed.org/DinsdaleSupplementalMaterial/</a> |
| 4440422.3.fasta            | Tpond microbe 3                                           | 2     | 0     | <a href="http://www.theseed.org/DinsdaleSupplementalMaterial/">http://www.theseed.org/DinsdaleSupplementalMaterial/</a> |
| formaldehyde_fas           | Washington Lake                                           | 16013 | 15373 | <a href="http://genome.jgi-psf.org/lakwa/lakwa.info.html">http://genome.jgi-psf.org/lakwa/lakwa.info.html</a>           |
| formate_fas                | Washington Lake                                           | 4699  | 4622  | <a href="http://genome.jgi-psf.org/lakwa/lakwa.info.html">http://genome.jgi-psf.org/lakwa/lakwa.info.html</a>           |
| methane_fas                | Washington Lake                                           | 17051 | 16542 | <a href="http://genome.jgi-psf.org/lakwa/lakwa.info.html">http://genome.jgi-psf.org/lakwa/lakwa.info.html</a>           |

|                           |                     |       |       |                                                                                                               |
|---------------------------|---------------------|-------|-------|---------------------------------------------------------------------------------------------------------------|
| methano_fas               | Washington Lake     | 16461 | 16016 | <a href="http://genome.jgi-psf.org/lakwa/lakwa.info.html">http://genome.jgi-psf.org/lakwa/lakwa.info.html</a> |
| methylamine_fas           | Washington Lake     | 14871 | 14550 | <a href="http://genome.jgi-psf.org/lakwa/lakwa.info.html">http://genome.jgi-psf.org/lakwa/lakwa.info.html</a> |
| AerobicBasingenomic.fasta | Waste Water Mallard | 6386  | 4763  | <a href="http://sra.dnanexus.com/runs/SRR001308">http://sra.dnanexus.com/runs/SRR001308</a>                   |

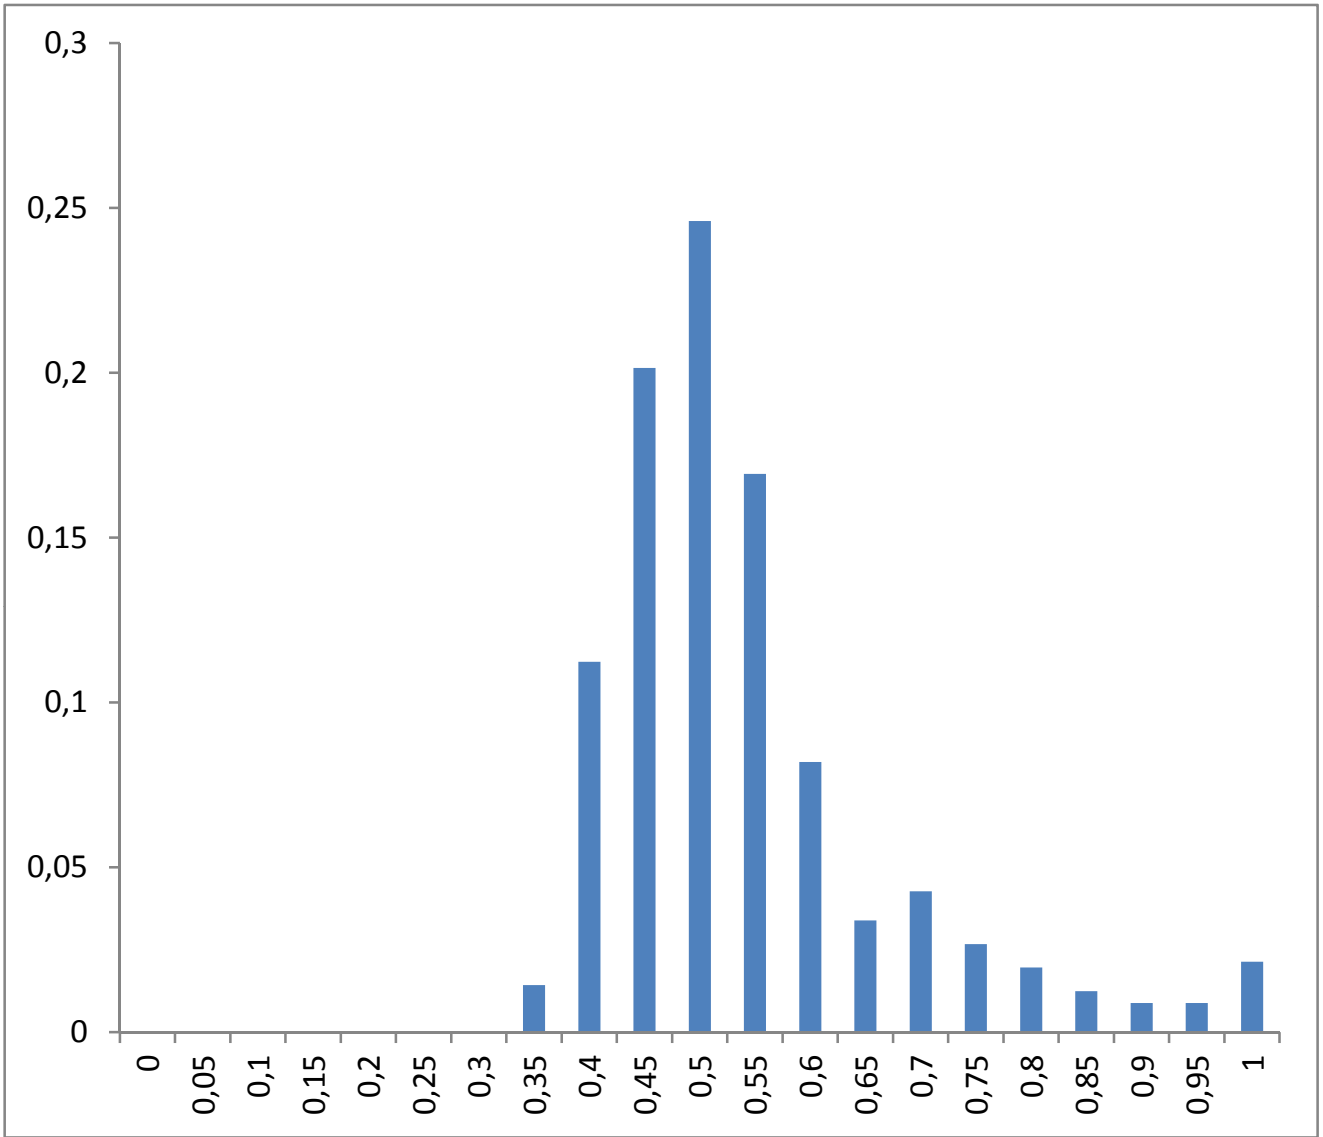

Supplement: 13062_2015_92_MOESM1_ESM.pdf [file 13062_2015_92_MOESM1_ESM.pdf]
